# Supplementary material for: Comparative transcriptomics of female and male gametocytes in Plasmodium berghei and the evolution of sex in alveolates
Source: PubMed Central journal article supplement (PMC5604118; doi:10.1186/s12864-017-4100-0), 2017-09-18

## By absolute expression

## By relative expression to asexual stages

Top quartile

Top decile

Asexual

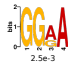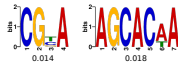

Female

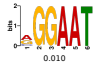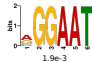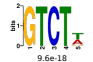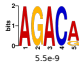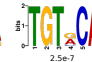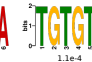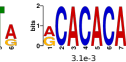

Male

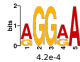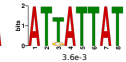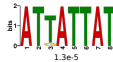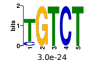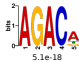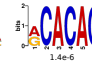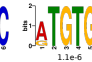

Female n male

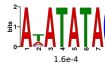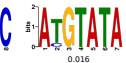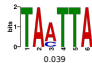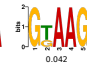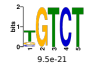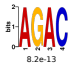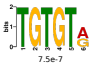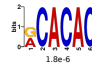

Supplement: 12864_2017_4100_MOESM7_ESM.pdf [file 12864_2017_4100_MOESM7_ESM.pdf]
