# Supplementary material for: Comparative transcriptomics of female and male gametocytes in Plasmodium berghei and the evolution of sex in alveolates
Source: PubMed Central journal article supplement (PMC5604118; doi:10.1186/s12864-017-4100-0), 2017-09-18
Supplement: 12864_2017_4100_MOESM8_ESM.pdf [file 12864_2017_4100_MOESM8_ESM.pdf]

Pf male ↑  
1237 total

Pb male ↑  
2497 total

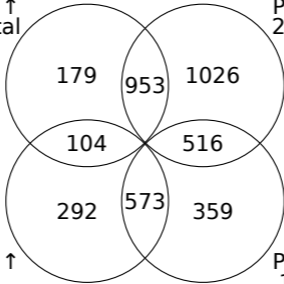

Pb female ↑  
969 total

Pf female ↑  
1448 total
